# Supplementary material for: Socioeconomic Status and Its Relation to Hypertension in Rural Nepal
Source: Hindawi journal article supplement (doi:10.1155/2021/5542438), 2021-08-28
Supplement: f1 [file 5542438.f1.pdf]

## Supplementary Tables

**Supplementary Table 1: Distribution of socioeconomic position in relation to age, sex and lifestyle factors**

|                               | Education                      |                                  |                               | Income               |                         |                       |
|-------------------------------|--------------------------------|----------------------------------|-------------------------------|----------------------|-------------------------|-----------------------|
|                               | No formal education<br>(N=113) | Less than high school<br>(n=106) | High School or more<br>(n=41) | Low income<br>(n=87) | Middle income<br>(n=87) | High income<br>(n=86) |
| <b>Sex</b>                    |                                |                                  |                               |                      |                         |                       |
| Male                          | 36 (31.9)                      | 71 (67.0)                        | 27 (65.8)                     | 51 (58.6)            | 41 (47.1)               | 34 (39.5)             |
| Female                        | 77 (68.1)                      | 35 (33.0)                        | 14 (34.2)                     | 36 (41.4)            | 46 (52.9)               | 52 (60.5)             |
| <b>Age groups in years</b>    |                                |                                  |                               |                      |                         |                       |
| 18-34                         | 12 (10.6)                      | 41 (38.7)                        | 24 (58.5)                     | 15 (17.3)            | 23 (26.4)               | 39 (45.3)             |
| 35-49                         | 33 (29.2)                      | 41 (38.7)                        | 14 (34.2)                     | 24 (27.6)            | 36 (41.9)               | 28 (32.7)             |
| 50-65                         | 35 (31.0)                      | 17 (16.0)                        | 3 (7.3)                       | 21 (24.1)            | 19 (21.8)               | 15 (17.4)             |
| 66 and above                  | 33 (29.2)                      | 7 (6.6)                          | 0 (0.0)                       | 27 (31.0)            | 9 (10.3)                | 4 (4.6)               |
| Age in years, Mean (SD)       | 54.8 (15.7)                    | 40.1 (13.5)                      | 33.2 (10.1)                   | 52.8 (17.3)          | 44.8 (14.7)             | 38.6 (14.1)           |
| <b>Tobacco use</b>            |                                |                                  |                               |                      |                         |                       |
| Never                         | 40 (35.4)                      | 40 (37.8)                        | 28 (68.3)                     | 33 (37.9)            | 31 (35.6)               | 44 (51.2)             |
| Current                       | 21 (18.6)                      | 33 (31.1)                        | 6 (14.6)                      | 19 (21.8)            | 24 (27.6)               | 17 (19.8)             |
| Former                        | 52 (46.0)                      | 33 (31.1)                        | 7 (17.1)                      | 35 (40.2)            | 32 (36.8)               | 25 (29.1)             |
| <b>Alcohol intake</b>         |                                |                                  |                               |                      |                         |                       |
| Never                         | 95 (84.1)                      | 71 (66.9)                        | 29 (70.7)                     | 71 (81.6)            | 63 (72.4)               | 61 (70.9)             |
| Low (<1 glass per week)       | 2 (1.8)                        | 6 (5.7)                          | 4 (9.8)                       | 4 (4.6)              | 4 (4.6)                 | 4 (4.7)               |
| Moderate (1-3 glass per week) | 7 (6.2)                        | 6 (5.7)                          | 1 (2.4)                       | 4 (4.6)              | 7 (8.1)                 | 3 (3.5)               |
| High (>3 glass per week)      | 9 (7.9)                        | 23 (21.7)                        | 7 (17.1)                      | 8 (9.2)              | 13 (14.9)               | 18 (20.9)             |
| <b>Physical activity</b>      |                                |                                  |                               |                      |                         |                       |

|                                                    |            |            |            |            |            |            |
|----------------------------------------------------|------------|------------|------------|------------|------------|------------|
| MET* < 600<br>min/week                             | 14 (12.4)  | 10 (9.4)   | 2 (4.9)    | 12 (13.8)  | 4 (4.6)    | 10 (11.6)  |
| MET ≥ 600<br>min/week                              | 99 (87.6)  | 96 (90.6)  | 39 (95.1)  | 75 (86.1)  | 83 (95.4)  | 76 (88.4)  |
| <b>Fruits and<br/>vegetables<br/>servings</b>      |            |            |            |            |            |            |
| <2 servings<br>per day                             | 10 (8.8)   | 17 (16.0)  | 8 (19.5)   | 9(10.3)    | 11 (12.7)  | 15 (17.5)  |
| 2-4 servings<br>per day                            | 95 (84.1)  | 80 (75.5)  | 29 (70.7)  | 71 (81.6)  | 67 (77.0)  | 66 (76.7)  |
| >4 servings<br>per day                             | 8 (7.1)    | 9 (8.5)    | 4 (9.8)    | 7 (8.1)    | 9 (10.3)   | 5 (5.8)    |
| <b>Body Mass<br/>Index**<br/>kg/m<sup>2</sup>,</b> |            |            |            |            |            |            |
| Normal<br>weight                                   | 66 (58.4)  | 72 (67.9)  | 22 (53.7)  | 52 (59.8)  | 59 (67.8)  | 49 (57.0)  |
| Under<br>weight                                    | 26 (23.0)  | 8 (7.5)    | 2 (4.9)    | 21 (24.1)  | 9 (10.3)   | 6 (7.0)    |
| Overweight                                         | 17 (15.0)  | 20 (18.9)  | 15 (36.6)  | 10 (11.5)  | 15 (17.3)  | 27 (31.4)  |
| Obesity                                            | 4 (3.5)    | 6 (5.7)    | 2 (4.9)    | 4 (4.6)    | 4 (4.6)    | 4 (4.6)    |
| BMI kg/m <sup>2</sup> ,<br>mean (SD)               | 21.5 (3.8) | 23.1 (3.8) | 24.0 (3.7) | 21.2 (3.8) | 22.5 (3.7) | 23.8 (3.8) |

\*MET is the ratio of the rate of energy expended during an activity to the rate of energy expended at rest. \*\*defined based on WHO criteria

**Supplementary Table 2: Informal assessment of mediating role of life style factors using logistic regression**

| <b>Socioeconomic Variables</b> | <b>Model 1<sup>a</sup><br/>OR<sup>b</sup><br/>(95%CI)</b> | <b>Model 1 &amp;<br/>Tobacco<br/>use<br/>OR<sup>b</sup><br/>(95%CI)</b> | <b>Model 1 &amp;<br/>Alcohol<br/>intake<br/>OR<sup>b</sup><br/>(95%CI)</b> | <b>Model 1 &amp;<br/>Physical<br/>activity<br/>OR<sup>b</sup><br/>(95%CI)</b> | <b>Model 1 &amp;<br/>Fruits and<br/>vegetables<br/>servings<br/>OR<sup>b</sup><br/>(95%CI)</b> | <b>Model 1<br/>&amp; BMI<br/>OR<sup>b</sup><br/>(95%CI)</b> | <b>Model<br/>2<sup>c</sup><br/>OR<sup>b</sup><br/>(95%CI)</b> |
|--------------------------------|-----------------------------------------------------------|-------------------------------------------------------------------------|----------------------------------------------------------------------------|-------------------------------------------------------------------------------|------------------------------------------------------------------------------------------------|-------------------------------------------------------------|---------------------------------------------------------------|
| <b>Income</b>                  |                                                           |                                                                         |                                                                            |                                                                               |                                                                                                |                                                             |                                                               |
| Low                            | Ref (1.0)                                                 | Ref (1.0)                                                               | Ref (1.0)                                                                  | Ref (1.0)                                                                     | Ref (1.0)                                                                                      | Ref (1.0)                                                   | Ref (1.0)                                                     |
| Middle                         | 1.1 (0.4 - 2.6)                                           | 1.0 (0.4-2.6)                                                           | 1.1(0.5-2.6)                                                               | 1.0 (0.4 - 2.4)                                                               | 1.1 (0.4-2.6)                                                                                  | 0.9 (0.4- 2.3)                                              | 0.9 (0.3 -2.2)                                                |
| High                           | 1.5 (0.6- 3.7)                                            | 1.4 (0.9-6.4)                                                           | 1.5 (0.6-4.0)                                                              | 1.2 (0.5- 3.2)                                                                | 1.4 (0.6-3.7)                                                                                  | 1.1 (0.4- 2.9)                                              | 1.0 (0.4- 2.7)                                                |
| <b>Education</b>               |                                                           |                                                                         |                                                                            |                                                                               |                                                                                                |                                                             |                                                               |
| No formal education            | Ref (1.0)                                                 | Ref (1.0)                                                               | Ref (1.0)                                                                  | Ref (1.0)                                                                     | Ref (1.0)                                                                                      | Ref (1.0)                                                   | Ref (1.0)                                                     |
| Less than high school          | 2.5 (0.9- 6.6)                                            | 2.4 (0.9-6.4)                                                           | 2.5 (1.0-6.7)                                                              | 2.7 (1.0- 7.5)                                                                | 2.5 (0.9-6.5)                                                                                  | 2.0 (0.7- 5.5)                                              | 2.3 (0.8- 6.5)                                                |
| High school and above          | 3.2 (0.8- 12.5)                                           | 3.1 (0.7- 12.0)                                                         | 3.3 (0.9-13.0)                                                             | 3.4 (0.9- 13.2)                                                               | 3.3 (0.9- 13.0)                                                                                | 2.4 (0.6- 9.7)                                              | 2.7 (0.7- 10.9)                                               |
| <b>Employment status</b>       |                                                           |                                                                         |                                                                            |                                                                               |                                                                                                |                                                             |                                                               |
| Unemployed                     | Ref (1.0)                                                 | Ref (1.0)                                                               | Ref (1.0)                                                                  | Ref (1.0)                                                                     | Ref (1.0)                                                                                      | Ref (1.0)                                                   | Ref (1.0)                                                     |
| Farming                        | 1.0 (0.4- 2.7)                                            | 1.0 (0.4-2.6)                                                           | 1.0 (0.4-2.7)                                                              | 1.4 (0.5- 2.7)                                                                | 1.0 (0.4-2.7)                                                                                  | 1.3 (0.5- 3.6)                                              | 1.8 (0.6- 5.4)                                                |
| Employed                       | 2.9 (0.9- 9.1)                                            | 2.8 (0.9- 8.77)                                                         | 2.9 (0.9-9.4)                                                              | 3.2 (1.0- 10.6)                                                               | 2.8 (0.9-8.9)                                                                                  | 2.9 (0.9- 9.5)                                              | 3.3 (1.0- 11.4)                                               |

<sup>a</sup> Adjusted for age, sex, marital status and ethnicity <sup>b</sup>OR = Odds ratio; \*significant <0.05

<sup>c</sup>Adjusted for age, gender, marital status, ethnicity, physical activity, tobacco use, alcohol intake, vegetable and fruits servings and BMI



**Supplementary Table 3a: Mediated effects of income on hypertension via lifestyle factors**

| <b>Mediators</b>               | <b>Effect of income on mediators<br/>Beta (95% CI)</b> | <b>Effect of mediators on hypertension<br/>Beta (95% CI)</b> | <b>Effect of income on hypertension<br/>Beta (95% CI)</b> | <b>Indirect effect<br/>Mean (95% CI)</b> | <b>Direct effect<br/>Mean (95% CI)</b> | <b>Total Effect<br/>Mean (95% CI)</b> | <b>Prop. of Total Effect mediated<br/>Mean (95% CI)</b> |
|--------------------------------|--------------------------------------------------------|--------------------------------------------------------------|-----------------------------------------------------------|------------------------------------------|----------------------------------------|---------------------------------------|---------------------------------------------------------|
| Tobacco use                    | -8.49e-06 (-0.000 - 3.41e-06)                          | -0.240 (-1.090 - 0.610)                                      | 5.32e-06 (-3.38e-06 - 0.000)                              | -0.000 (-0.003 - 0.002)                  | 6.57e-07 (-4.94e-07 - 1.62e-06)        | -0.000 (-0.003 - 0.002)               | 0.242 (-18.440 - 21.501)                                |
| Alcohol intake                 | 1.12e-06 (-4.99e-06 - 7.23e-06)                        | -0.011 (-0.033 - 0.012)                                      | 6.16e-06 (-2.84e-06 - 0.000)                              | -0.000 (-0.000 - 0.000)                  | 7.73e-07 (-4.29e-07 - 1.75e-06)        | -0.000 (-0.000 - 0.000)               | 0.252 (-27.069 - 19.687)                                |
| Physical activity              | -9.02e-07 (-0.000 - 9.09e-06)                          | -0.000 (-0.000 - -2.56e-06)                                  | 4.87e-06 (-3.65e-06 - 0.000)                              | -1.98e-07 (-5.64e-07 - 3.34e-08)         | 7.35e-07 (-6.47e-07 - 1.87e-06)        | 5.37e-07 (-8.97e-07 - 1.68e-06)       | -0.224 (-4.598 - 3.525)                                 |
| Fruits and vegetables servings | 5.38e-06 (-1.22e-06 - 0.000)                           | 0.204 (-0.542 - 0.949)                                       | 5.50e-06 (-3.29e-06 - 0.000)                              | -0.001 (-0.002 - 0.005)                  | 6.76e-07 (-4.94e-07 - 1.63e06)         | 0.000 (-0.002 - 0.005)                | -0.398 (-22.349 - 8.736)                                |
| BMI                            | 6.48e-06 (-2.01e-06 - 0.000)                           | 1.375 (-0.639 - 2.111)                                       | 4.30e-06 (-4.37e-06 - 0.000)                              | 0.007 (0.000 - 0.016)                    | 4.93e-07 (-6.10e-07 - 1.41e-06)        | 0.007 (-0.000 - 0.016)                | 1.053 (0.389 - 6.422)                                   |

**Supplementary Table 3b: Mediated effects of education on hypertension via lifestyle factors**

| <b>Mediators</b>               | <b>Effect of education on mediators beta (95% CI)</b> | <b>Effect of mediators on hypertension beta (95% CI)</b> | <b>Effect of education on hypertension beta (95% CI)</b> | <b>Indirect effect Mean (95% CI)</b> | <b>Direct effect Mean (95% CI)</b> | <b>Total Effect Mean (95% CI)</b> | <b>Prop. of Total Effect mediated Mean (95% CI)</b> |
|--------------------------------|-------------------------------------------------------|----------------------------------------------------------|----------------------------------------------------------|--------------------------------------|------------------------------------|-----------------------------------|-----------------------------------------------------|
| Tobacco use                    | -0.555 (-1.217 - 0.106)                               | -0.240 (-1.090 - 0.610)                                  | -0.623 (-0.047 - 1.290)                                  | 0.002 (-0.008 - 0.012)               | 0.079 (-0.007 - 0.156)             | 0.081 (-0.004 - 0.157)            | 0.020 (-0.062 - 0.135)                              |
| Alcohol intake                 | -0.278 (-0.890 - 0.334)                               | -0.011 (-0.033 - 0.012)                                  | -0.649 (-0.018 - 1.316)                                  | 0.000 (-0.000 - 0.000)               | 0.085 (-0.003 - 0.161)             | 0.085 (-0.003 - 0.161)            | 0.001 (-0.003 - 0.004)                              |
| Physical activity              | -1.009 (-2.280 - 0.262)                               | -0.000 (-0.000 - -2.56e-06)                              | 0.572 (-0.097 - 1.241)                                   | 2.99e-07 (-3.27e-07 - 1.26e-06)      | 0.088 (-0.017 - 0.175)             | 0.088 (-0.017 - 0.175)            | 3.13e-06 (-0.000 - 0.000)                           |
| Fruits and vegetables servings | -0.267 (-0.794 - 0.259)                               | 0.204 (-0.542 - 0.949)                                   | 0.652(-0.017 - 1.321)                                    | -0.001 (-0.010 - 0.005)              | 0.083 (-0.002 - 0.160)             | 0.082 (-0.002 - 0.158)            | -0.012 (-0.075 - 0.040)                             |
| BMI                            | 0.943 (0.356 - 1.530)                                 | 1.365 (0.639 - 2.111)                                    | 0.416 (-0.270 - 1.103)                                   | 0.033 (0.010 - 0.061)                | 0.050 (-0.037 - 0.126)             | 0.083 (-0.005 - 0.159)            | 0.373 (-1.085 - 2.108)                              |

**Show cards used during Data collection**

**Source: Non-Communicable diseases Risk Factors: STEPS Survey Nepal 2013**

**1. Tobacco Products**

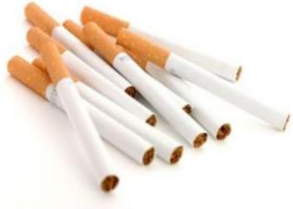

**Cigerrates**

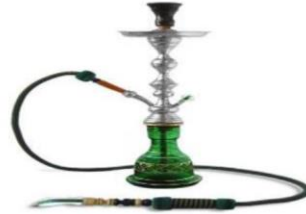

**Hookah**

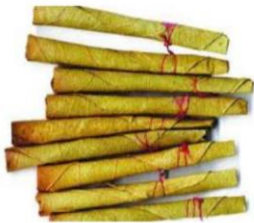

**Bidi**

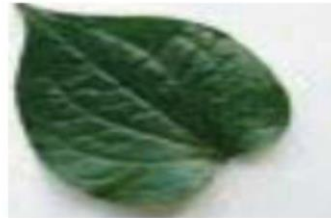

**Betel leaf**

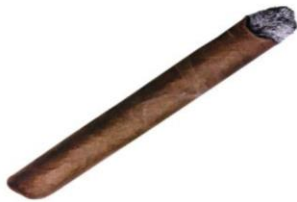

**Cigar**

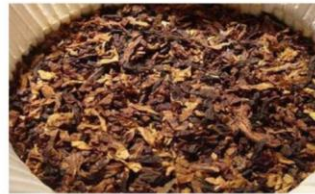

**Chewing tobacco**

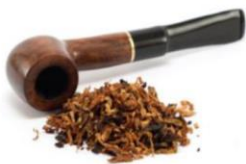

**Pipe**

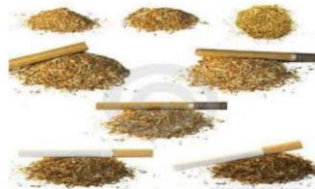

**Snuff  
available  
in wet  
and dry  
form**

## 2. Alcohol Vessel

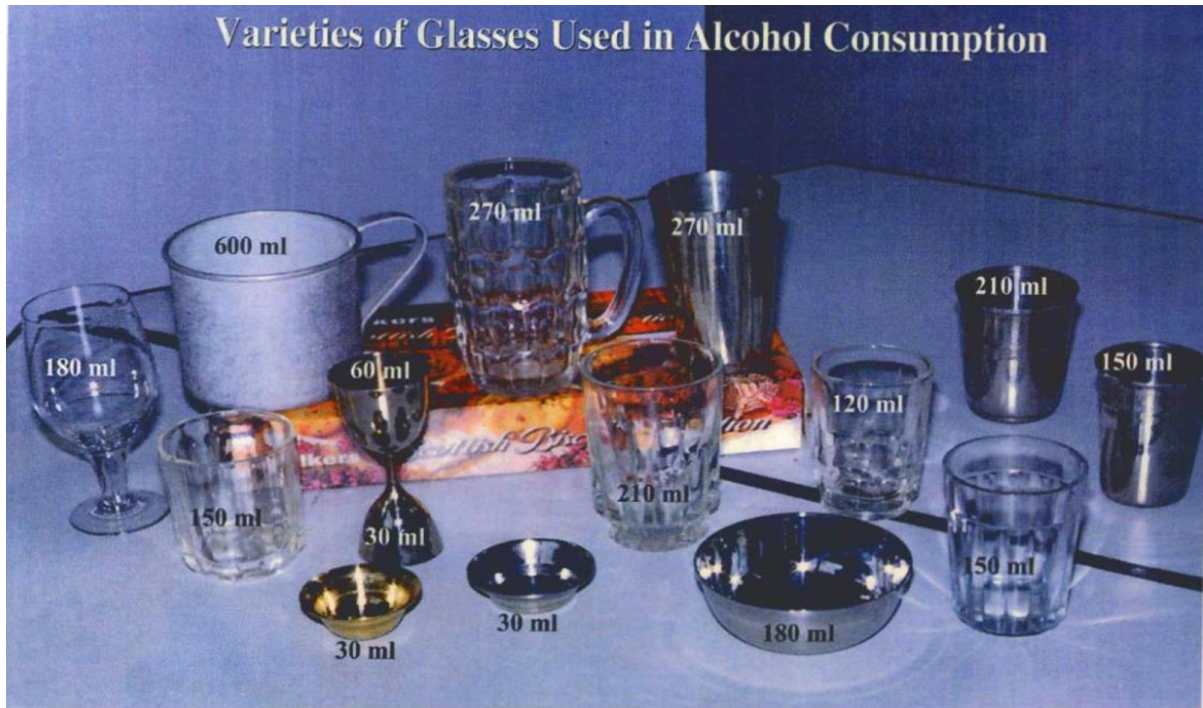



### 3. Diet

|                                                                                                          |                                                                                                         |                                                                                                           |                                                                                                        |
|----------------------------------------------------------------------------------------------------------|---------------------------------------------------------------------------------------------------------|-----------------------------------------------------------------------------------------------------------|--------------------------------------------------------------------------------------------------------|
| <b>JACK FRUIT</b><br>   | <b>BANANA</b><br>      | <br><b>GRAPES</b>       | <b>MANGO</b><br>    |
| <b>APPLE</b><br>        | <b>ORANGE</b><br>      | <b>PEACH</b><br>        | <b>PEAR</b><br>     |
| <b>STRAWBERRIES</b><br> | <b>WATERMELON</b><br> | <b>PINEAPPLE</b><br>   | <b>LYCHEES</b><br> |
| <b>POMELO</b><br>     | <b>PLUM</b><br>      | <b>GRAPEFRUIT</b><br> | <b>GUAVA</b><br>  |

Serving size: One standard serving = 80 grams

#### 4. Typical Physical activities

##### Vigorous activities

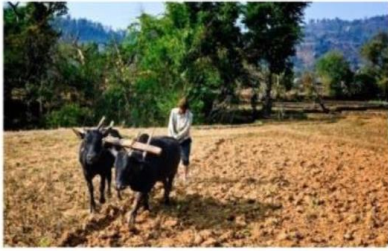

Ploughing field

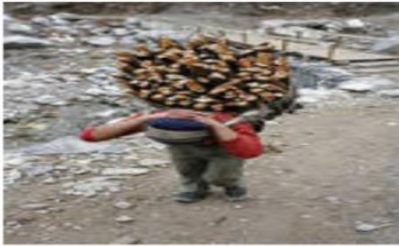

Carrying heavy load

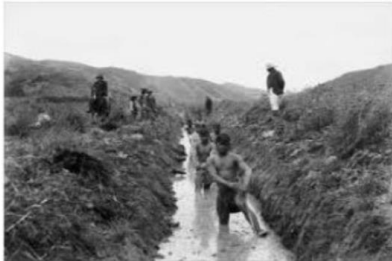

Digging ditch

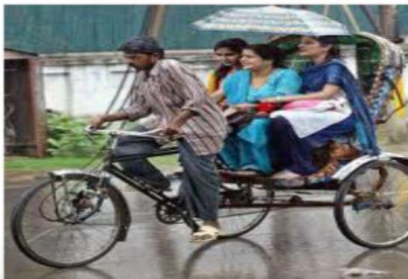

Cycle rickshaw driving

##### Moderate activities

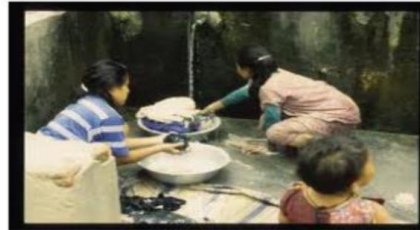

Housework and domestic chores

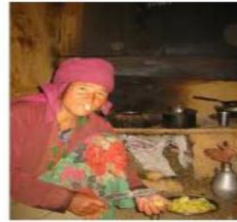

Kitchen Work

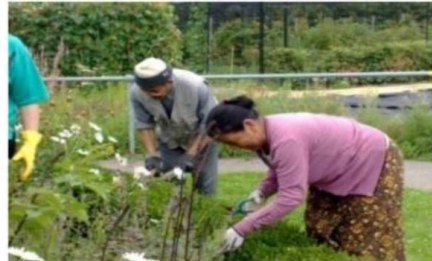

Gardening

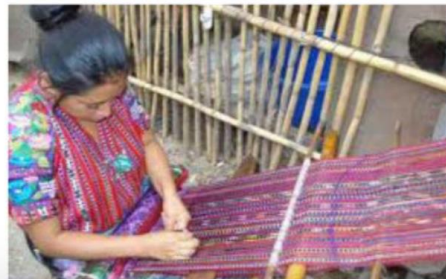

Weaving
